# Supplementary material
Source: MDPI journal article supplement (https://www.mdpi.com/2311-7524/9/10/1150)
Supplement: s1 [file s1]

**Table S1.** BLAST comparison between soursop and cherimoya genes.

| <i>Annona muricata</i> L. | <i>Annona cherimola</i>                   | Chr | %ID   | e-value                |
|---------------------------|-------------------------------------------|-----|-------|------------------------|
| PG02                      | <a href="#">Anche102Chr1g0081140.1</a>    | 1   | 95.65 | 0                      |
| PG15                      | <a href="#">Anche102Chr7g0106760.1</a>    | 7   | 92.88 | 1 x 10 <sup>-137</sup> |
| PG16                      | <a href="#">Anche102Chr5g0035880.1</a>    | 5   | 96.19 | 0                      |
| PG19                      | <a href="#">Anche102Chr7g0077190.1</a>    | 7   | 97.98 | 2 x 10 <sup>-42</sup>  |
| PG20                      | <a href="#">Anche102Chr3g0033310.1</a>    | 3   | 96.39 | 0                      |
| PG21                      | <a href="#">Anche102Chr3g0033310.1</a>    | 3   | 94.99 | 0                      |
| PG22                      | <a href="#">Anche102Chr3g0012310.2</a>    | 3   | 95.05 | 0                      |
| PG23                      | <a href="#">Anche102Chr7g0106760.1</a>    | 7   | 89.04 | 1 x 10 <sup>-153</sup> |
| PG26                      | <a href="#">Anche102Chr7g0077190.1</a>    | 7   | 96.76 | 2 x 10 <sup>-99</sup>  |
| PG27                      | <a href="#">Anche102Chr7g0077190.1</a>    | 7   | 94.90 | 3 x 10 <sup>-129</sup> |
| PG28                      | <a href="#">Anche102Chr7g0077200.1</a>    | 7   | 93.40 | 0                      |
| PG30                      | <a href="#">Anche102Chr7g0077220.1</a>    | 7   | 95.30 | 7 x 10 <sup>-103</sup> |
| PG32                      | <a href="#">Anche102Chr7g0106760.1</a>    | 7   | 90.45 | 0                      |
| PG33                      | <a href="#">Anche102Chr7g0129950.1</a>    | 7   | 94.28 | 1 x 10 <sup>-143</sup> |
| PG34                      | <a href="#">Anche102Chr7g0077230.1</a>    | 7   | 95.09 | 1 x 10 <sup>-116</sup> |
| PG35                      | <a href="#">Anche102Chr7g0106760.1</a>    | 7   | 92.12 | 3 x 10 <sup>-93</sup>  |
| PG44                      | <a href="#">Anche102Chr3g0055870.1</a>    | 3   | 95.89 | 5 x 10 <sup>-156</sup> |
| PG48                      | <a href="#">Anche102Chr4g0012330.1</a>    | 4   | 94.67 | 0                      |
| PG51                      | <a href="#">Anche102Chr1g0028910.1</a>    | 1   | 96.14 | 1 x 10 <sup>-105</sup> |
| PG52                      | <a href="#">Anche102Chr1g0028910.1</a>    | 1   | 97.04 | 1 x 10 <sup>-75</sup>  |
| PL26                      | <a href="#">Anche102Chr6g0072610.1</a>    | 6   | 96.42 | 0                      |
| PL12                      | <a href="#">Anche102Chr7g0077190.1</a>    | 7   | 93.69 | 1 x 10 <sup>-83</sup>  |
| PL19                      | <a href="#">Anche102Chr3g0055870.1</a>    | 3   | 93.85 | 4 x 10 <sup>-49</sup>  |
| PMEi01                    | <a href="#">Anche102Scf0009g0001120.1</a> |     | 94.24 | 0                      |
| PMEi04                    | <a href="#">Anche102Chr6g0059810.1</a>    | 6   | 92.05 | 1 x 10 <sup>-65</sup>  |
| PMEi05                    | <a href="#">Anche102Chr6g0060410.2</a>    | 6   | 94.48 | 0                      |

|        |                                           |   |       |                      |
|--------|-------------------------------------------|---|-------|----------------------|
| PMEi06 | <a href="#">Anche102Chr1g0037970.1</a>    | 1 | 95.00 | $1 \times 10^{-132}$ |
| PMEi11 | <a href="#">Anche102Chr5g0013680.1</a>    | 5 | 96.25 | 0                    |
| PMEi13 | <a href="#">Anche102Scf0009g0001190.1</a> |   | 95.13 | 0                    |
| PMEi14 | <a href="#">Anche102Scf0009g0001170.1</a> |   | 91.20 | $3 \times 10^{-79}$  |
| PMEi17 | <a href="#">Anche102Chr1g0037990.1</a>    | 1 | 94.15 | 0                    |
| PMEi21 | <a href="#">Anche102Chr5g0076180.1</a>    | 5 | 95.00 | 0                    |
| PMEi22 | <a href="#">Anche102Chr1g0011750.1</a>    | 1 | 96.46 | $5 \times 10^{-103}$ |
| PMEi29 | <a href="#">Anche102Chr1g0080830.1</a>    | 1 | 89.93 | $9 \times 10^{-100}$ |
| PMEi32 | <a href="#">Anche102Chr1g0080840.1</a>    | 1 | 94.04 | 0                    |
| PMEi38 | <a href="#">Anche102Scf0005g0001950.1</a> |   | 94.24 | 0                    |
| PMEi39 | <a href="#">Anche102Scf0005g0001970.1</a> |   | 94.36 | 0                    |
| PME01  | <a href="#">Anche102Chr1g0011490.1</a>    | 1 | 93.63 | $1 \times 10^{-81}$  |
| PME06  | <a href="#">Anche102Chr6g0059810.1</a>    | 6 | 94.79 | $2 \times 10^{-35}$  |
| PME07  | <a href="#">Anche102Chr6g0059720.1</a>    | 6 | 93.83 | $4 \times 10^{-174}$ |
| PME08  | <a href="#">Anche102Chr6g0059810.1</a>    | 6 | 97.16 | $2 \times 10^{-98}$  |
| PME13  | <a href="#">Anche102Chr1g0037970.1</a>    | 1 | 96.91 | 0                    |
| PME17  | <a href="#">Anche102Chr1g0065340.1</a>    | 1 | 95.96 | $1 \times 10^{-86}$  |
| PME19  | <a href="#">Anche102Chr6g0060410.2</a>    | 6 | 75.71 | $2 \times 10^{-19}$  |
| PME21  | <a href="#">Anche102Chr1g0011470.1</a>    | 1 | 95.58 | 0                    |
| PME26  | <a href="#">Anche102Chr1g0011490.1</a>    | 1 | 95.52 | $2 \times 10^{-98}$  |
| PME27  | <a href="#">Anche102Chr1g0011480.1</a>    | 1 | 95.12 | 0                    |
| PME30  | <a href="#">Anche102Chr1g0011490.1</a>    | 1 | 92.31 | $2 \times 10^{-157}$ |
| PME31  | <a href="#">Anche102Chr1g0011490.1</a>    | 1 | 95.80 | $6 \times 10^{-130}$ |
| PME32  | <a href="#">Anche102Chr1g0011490.1</a>    | 1 | 92.42 | $1 \times 10^{-81}$  |
